# Supplementary material for: Chemo-enzymatic one-pot depolymerization of β-chitin
Source: Royal Society of Chemistry journal article supplement (doi:10.1039/d5sc07429k), 2026-01-01
Supplement: d5sc07429k2.xlsx [file d5sc07429k2.xlsx]

## Sheet: Fig. 2A
H2O2 delivery method	Reaction time	[CBA]	[GlcNac]	TON	TOF	Saccharification	Residual [H2O2]	Ascorbate Utilization / %
	/ h	/ µM (±)	/ µM (±)		/ h-1	/ %	/ µM
Flow @ 0.252 uMol/min or 25 uL/min from a 10.1 mM solution	0	0 (0)	0 (0)	0	0	0	0	0
	0.25	171 (5)	387 (22)	342	1368	1.6	B.D.L	0
	0.5	331 (11)	682 (12)	662	1324	3	72	0
	1	357 (8)	732 (11)	714	714	3.2	98	4
	2	327 (22)	760 (18)	654	327	3.1	600	24
	4	339 (22)	786 (19)	678	170	3.2	1159	51
Single injection (1 mM)	0	0 (0)	0 (0)	0	0	0	1073	0
	0.25	120 (5)	371 (32)	240	960	1.4	922	12
	0.5	145 (16)	395 (21)	290	580	1.5	808	21
	1	131 (9)	382 (5)	262	262	1.4	802	43
	2	152 (17)	416 (24)	304	152	1.5	816	72
	4	137 (10)	392 (29)	274	69	1.5	786	91
Chemo-catalyst (0.1 mg mL-1)	0	0 (0)	0 (0)	0	0	0	0	0
	0.25	278 (38)	895 (34)	556	2227	3.2	B.D.L	2
	0.5	390 (20)	1193 (59)	780	1560	4.4	B.D.L	6
	1	500 (23)	1301 (88)	1000	1000	5.1	B.D.L	15
	2	603 (27)	1510 (33)	1206	603	6	B.D.L	25
	4	659 (22)	1970 (366)	1318	329	7.3	15	57

## Sheet: Fig. 2C
[smAA10A]	Reaction time	[CBA]	TON	TOF	Residual H2O2 / µM (±)
/ µM	/ h	/ µM (±)		/ h-1
1	0.25	318 (16)	318	1272	BDL
	0.5	558 (14)	558	1117	BDL
	1	655 (20)	655	655	BDL
	2	666 (33)	666	333	44 (7)
	4	679 (28)	679	170	42 (7)
	6	702 (33)	702	117	48 (2)
0.25	0.25	99 (5)	396	1585	62 (13)
	0.5	96 (2)	385	770	230 (32)
	1	107 (5)	428	428	366 (26)
	2	105 (6)	420	210	465 (17)
	4	97 (6)	389	97	430 (44)
	6	110 (5)	440	73	475 (39)

## Sheet: Fig. 2D
[β-chitin]	Reaction time	[CBA]	TON	TOF	Residual H2O2 / µM		[Ascorbic Acid]	Reaction time	[CBA]	TON	TOF	Residual H2O2 / µM (±)
/ mg mL-1	/ h	/ µM (±)		/ h-1			/ mM	/ h	/ µM (±)		/ h-1
5	0.25	114 (3)	228	910	BDL		2	0.25	361 (10)	722	2889	BDL
	0.5	179 (2)	357	715	BDL			0.5	470 (12)	941	1882	BDL
	1	260 (10)	517	517	BDL			1	647 (34)	1294	1294	BDL
	2	280 (40)	553	276	BDL			2	638 (29)	1276	638	BDL
	4	278 (25)	556	139	81 (9)			4	661 (25)	1321	330	BDL
	6	274 (4)	548	91	126 (11)			6	655 (42)	1310	218	BDL
20	0.25	317 (9)	634	2538	BDL		0.5	0.25	139 (5)	278	1112	63 (9)
	0.5	466 (40)	931	1862	BDL			0.5	180 (3)	360	720	277 (22)
	1	547 (45)	1095	1095	BDL			1	280 (22)	560	560	231 (19)
	2	676 (56)	1353	676	BDL			2	301 (51)	602	301	249 (17)
	4	867 (82)	1735	434	BDL			4	290 (30)	580	145	200 (15)
	6	1000 (90)	1927	321	84 (15)			6	281 (32)	562	94	187 (6)

## Sheet: Fig. 2E
[0.5%Au-0.5%Pd/TiO2]	Reaction time	[CBA]	TON	TOF	Residual H2O2 / µM (±)
/ mg mL-1	/ h	/ µM (±)		/ h-1
0.2	0.25	417 (3)	834	3336	30 (5)
	0.5	415 (31)	830	1659	42 (8)
	1	418 (30)	836	836	150 (67)
	2	414 (34)	829	414	203 (46)
	4	431 (36)	862	216	257 (54)
	6	411 (19)	822	137	160 (1)
0.05	0.25	246 (10)	493	1970	BDL
	0.5	345 (32)	690	1380	BDL
	1	438 (43)	876	876	BDL
	2	568 (24)	1137	568	BDL
	4	681 (59)	1363	341	BDL
	6	809 (88)	1618	270	BDL

## Sheet: Fig. 3A
[catalyst]	Reaction time	[CBA]	[GlcNac]	TON	TOF	Saccharification	Residual H2O2	AscA conversion / %
/ mg mL-1	/ h	/ µM (±)	/ µM (±)		/ h-1	/ %	/ µM (±)
0	24	598 (33)	1544 (236)	1197	50	6.1	BDL	75
	48	786 (62)	2401 (207)	1572	33	8.8	BDL	92
	72	929 (27)	2789 (66)	1857	26	10.3	BDL	100
	96	922 (70)	2850 (50)	1843	19	10.4	BDL	100
0.025	24	2021 (114)	6481 (310)	4042	168	23.3	BDL	14
	48	2189 (141)	6991 (202)	4378	91	25.1	BDL	85
	72	2227 (86)	6950 (404)	4454	62	25.2	BDL	100
	96	2396 (142)	6916 (144)	4792	50	25.9	BDL	100
0.05	24	2274 (293)	6692 (349)	4548	189	24.9	BDL	20
	48	2529 (179)	8061 (390)	5057	105	29	BDL	76
	72	3090 (246)	9828 (467)	6180	86	35.4	BDL	100
	96	3186 (201)	9901 (597)	6372	66	36	BDL	100
0.075	24	681 (56)	1593 (200)	1362	57	8.6	BDL	100
	48	676 (29)	1493 (159)	1352	28	8.1	BDL	100
	72	695 (42)	1542 (290)	1391	19	8.4	BDL	100
	96	672 (54)	1741 (139)	1345	14	9.2	BDL	100
0.1	24	660 (50)	1922 (172)	1320	55	7.2	170 (46)	100
	48	698 (78)	1962 (201)	1396	29	7.4	BDL	100
	72	700 (53)	1930 (100)	1400	19	7.4	BDL	100
	96	697 (27)	1873 (256)	1394	15	7.2	BDL	100
0.2	24	414 (34)	1184 (93)	828	35	4.5	BDL	100
	48	431 (36)	1192 (99)	862	18	4.5	BDL	100
	72	411 (19)	1137 (52)	822	11	4.3	BDL	100
	96	417 (29)	1098 (79)	834	9	4.3	BDL	100
